# Supplementary material
Source: PubMed Central journal article supplement (PMC3436515)
Supplement: supp_M112.384594_jbc.M112.384594-1.pdf [file supp_M112.384594_jbc.M112.384594-1.pdf]

Chemically Programmed Bispecific Antibodies that Recruit and Activate T Cells\*

Huiting Cui<sup>a</sup>, Joshua D. Thomas<sup>b</sup>, Terrence R. Burke, Jr.<sup>b</sup>, and Christoph Rader<sup>a,1</sup>

From the <sup>a</sup>Experimental Transplantation and Immunology Branch, Center for Cancer Research, National Cancer Institute, National Institutes of Health, Bethesda, MD 20892 and the <sup>b</sup>Chemical Biology Laboratory, Frederick National Laboratory for Cancer Research, Center for Cancer Research, National Cancer Institute, National Institutes of Health, Frederick, MD 21702

Running title: *Chemically programmed bispecific antibodies*

<sup>1</sup>To whom correspondence should be addressed at present address: Department of Cancer Biology and Department of Molecular Therapeutics, The Scripps Research Institute, Scripps Florida, 130 Scripps Way #2C1, Jupiter, FL 33458, USA, Tel: (561) 228-2053; E-mail: [crader@scripps.edu](mailto:crader@scripps.edu)

### SUPPLEMENTAL EXPERIMENTAL PROCEDURES

*Synthesis of chemical compounds* - The synthesis of *LLP2A-biotin-maleimide* was described previously (1). The synthesis of *folate-biotin-maleimide* will be described elsewhere. Synthesis of *(LLP2A)2-biotin-maleimide*: NovaSyn TGR resin (0.2 mmol/g loading) was purchased from Novabiochem. All protected amino acids and peptide coupling reagents, with the exception of diisopropylcarbodiimide (DIC), were obtained from the following vendors: Novabiochem, Advanced ChemTech, and Chem-Impex International. All other reagents were obtained from Sigma-Aldrich. High-resolution mass spectra (HRMS) were measured by the University of California Riverside Mass Spectrometry Facility. Solid-phase syntheses were carried out in 10 mL reaction columns (Pierce) using a LabQuake shaker (Barnstead Thermolyne). Unless stated otherwise, the resin was washed with N-methyl-2-pyrrolidone (NMP) (6 x 7 mL) following each cycle of coupling, capping (with acetylimidazole), and deprotection. Coupling was performed at room temperature in NMP and monitored via the Kaiser test (1). A solution of 1-acetylimidazole (10 % (w/v) in dimethylformamide (DMF), 1-1.5 h) was used to acetylate or “cap” any unreacted amino groups on the resin at the end of each coupling step. Deprotection of Fmoc was accomplished with 20 % piperidine in DMF (2 x 15 min). Reaction products requiring HPLC purification were purified using a Waters PrepLC 4000 preparative HPLC system having photodiode array detection and using a Phenomenex C<sub>18</sub> column (250 mm x 21 mm; 5- $\mu$ m particle size, 110 Å pore size) at a flow rate of 10 mL/min. HPLC solvent system consisted of: Solvent A = 0.1 % (w/v) trifluoroacetic acid (TFA) in H<sub>2</sub>O, Solvent B = 0.1 % (w/v) TFA in acetonitrile. To a pre-swollen (2 h) suspension of NovaSyn TGR resin (0.500 g, 0.100 mmol) in NMP was added Fmoc-Lys(Mtt)-OH (0.312 g, 0.500 mmol), *N*-hydroxybenzotriazole (HOBt; 0.068 g, 0.500 mmol), *O*-(benzotriazol-1-yl)-*N,N,N',N'*-tetramethyluroniumhexafluorophosphate (HBTU; 0.190 g, 0.500 mmol), and *N,N*-diisopropylethylamine (DIEA; 174  $\mu$ L, 1.00 mmol). The mixture was agitated for 2 h at room temperature. In order to push the reaction to completion, the coupling was repeated overnight at room temperature with DIC (77.4  $\mu$ L, 0.500 mmol), Fmoc-Lys(Mtt)-OH (0.500 mmol), and HOBt (0.500 mmol). A solution of Fmoc-Lys(biotin)-OH (0.297 g, 0.500 mmol), HOBt (0.500 mmol), HBTU (0.500 mmol), and DIEA (1.00 mmol) was added and the mixture was then agitated 4 h. A solution of Fmoc-Lys(Fmoc)-OH (0.591 g, 1.00 mmol), HOBt (0.135 g, 1.00 mmol), and DIC (155  $\mu$ L, 0.126 g, 1.00 mmol) was added and the resin mixture was shaken overnight. A solution of Fmoc-Arg(Pbf)-OH (0.649 g, 1.00 mmol), HBTU (0.379 g, 1.00 mmol), HOBt (0.135 g, 1.00 mmol), and DIEA (349  $\mu$ L, 2.00 mmol) was added and then the resin was shaken 3.5 h. A solution of Fmoc-PEG-SU (2) (0.471 g, 1.00 mmol), HOBt (0.135 g, 1.00 mmol), and DIC (155  $\mu$ L, 1.00 mmol) was added to the resin and the mixture was then shaken overnight. The length of the PEG-SU linker was extended by allowing the resin to react 2 h with additional Fmoc-PEG-SU (0.471 g, 1.00 mmol), HOBt (0.135 g, 1.00 mmol), HBTU (0.379 g, 1.00 mmol), and DIEA (349  $\mu$ L, 2.0 mmol). After capping and Fmoc-deprotection, LLP2A was synthesized at both *N*-termini as described previously (3). The *C*-terminal Mtt protecting group was removed by washing the pre-swollen (3.5 h in

dichloromethane (DCM)) resin with a mixture of TFA/triisopropylsilane (TIS)/DCM (1:5:94, 3 x 2 min, then 4 x 5 min) until the filtrate was colorless. The resin was washed with DCM, methanol, DMF and then was swollen 2 h in NMP. The TFA salt was neutralized by washing the resin with 10 % DIEA in DMF (2 x) and then DMF. A solution of 3-maleimidopropionic acid (0.169 g, 1.00 mmol), *O*-(7-azabenzotriazol-1-yl)-*N,N,N',N'*-tetramethyluronium hexafluorophosphate (HATU; 0.380 g, 1.00 mmol), and DIEA (349  $\mu$ L, 2.00 mmol) was added and then shaken 2 h. The resin was washed with DMF, methanol, DCM, diethyl ether and then dried under high vacuum. The product was cleaved from the resin over 2 h in a mixture of TFA/TIS/H<sub>2</sub>O (95:2.5:2.5), precipitated with diethyl ether, and then purified by HPLC (15 % B, hold 2 min then gradient to 90 % B, over 23 min) to afford (LLP2A)<sub>2</sub>-biotin-maleimide as a colorless solid (78 mg). HRMS (ESI) calculated for C<sub>173</sub>H<sub>256</sub>N<sub>40</sub>O<sub>42</sub>S: 3597.8841. Found 3597.8733.

## SUPPLEMENTAL REFERENCES

1. Thomas, J. D., Hofer, T., Rader, C., and Burke, T. R., Jr. (2008) Application of a trifunctional reactive linker for the construction of antibody-drug hybrid conjugates. *Bioorg. Med. Chem. Lett.* **18**, 5785-5788
2. Kaiser, E., Colescott, R. L., Bossinger, C. D., Cook, P. I. (1970) Color test for detection of free terminal amino groups in the solid-phase synthesis of peptides. *Anal. Biochem.* **34**, 595-598
3. Song, A., Wang, X., Zhang, J., Marik, J., Lebrilla, C. B., and Lam, K. S. (2004) Synthesis of hydrophilic and flexible linkers for peptide derivatization in solid phase. *Bioorg. Med. Chem. Lett.* **14**, 161-165

## SUPPLEMENTAL FIGURE

**SUPPLEMENTAL FIGURE S1. Synthetic compounds for chemical programming.** Structures of LLP2A-biotin-maleimide (*left*), (LLP2A)<sub>2</sub>-biotin-maleimide (*center*), and folate-biotin-maleimide (*right*).

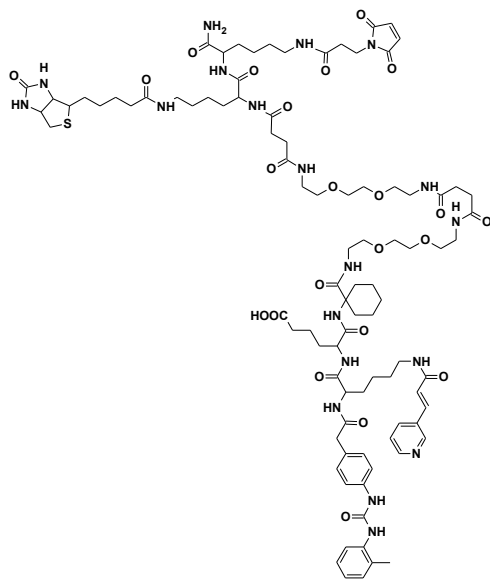

*LLP2A-biotin-maleimide*

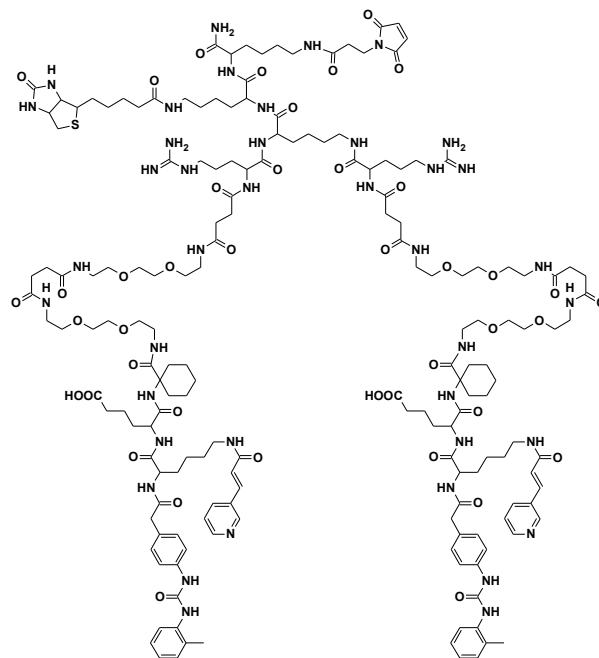

*(LLP2A)2-biotin-maleimide*

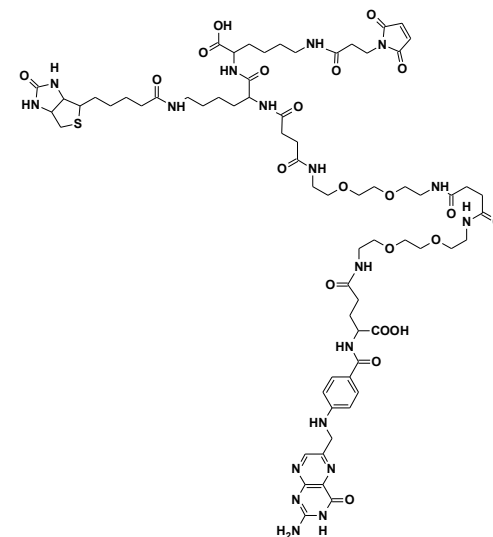

*folate-biotin-maleimide*
